# Supplementary material for: Poly(ADP-ribose) glycohydrolase coordinates meiotic DNA double-strand break induction and repair independent of its catalytic activity
Source: PubMed Central journal article supplement (PMC7519143; doi:10.1038/s41467-020-18693-1), 2020-09-25
Supplement: 41467_2020_18693_MOESM1_ESM.pdf [file 41467_2020_18693_MOESM1_ESM.pdf]

## **Supplementary Information**

**“Poly(ADP-ribose) glycohydrolase coordinates meiotic DNA double-strand break  
induction and repair independent of its catalytic activity”**

Janisiw et al.

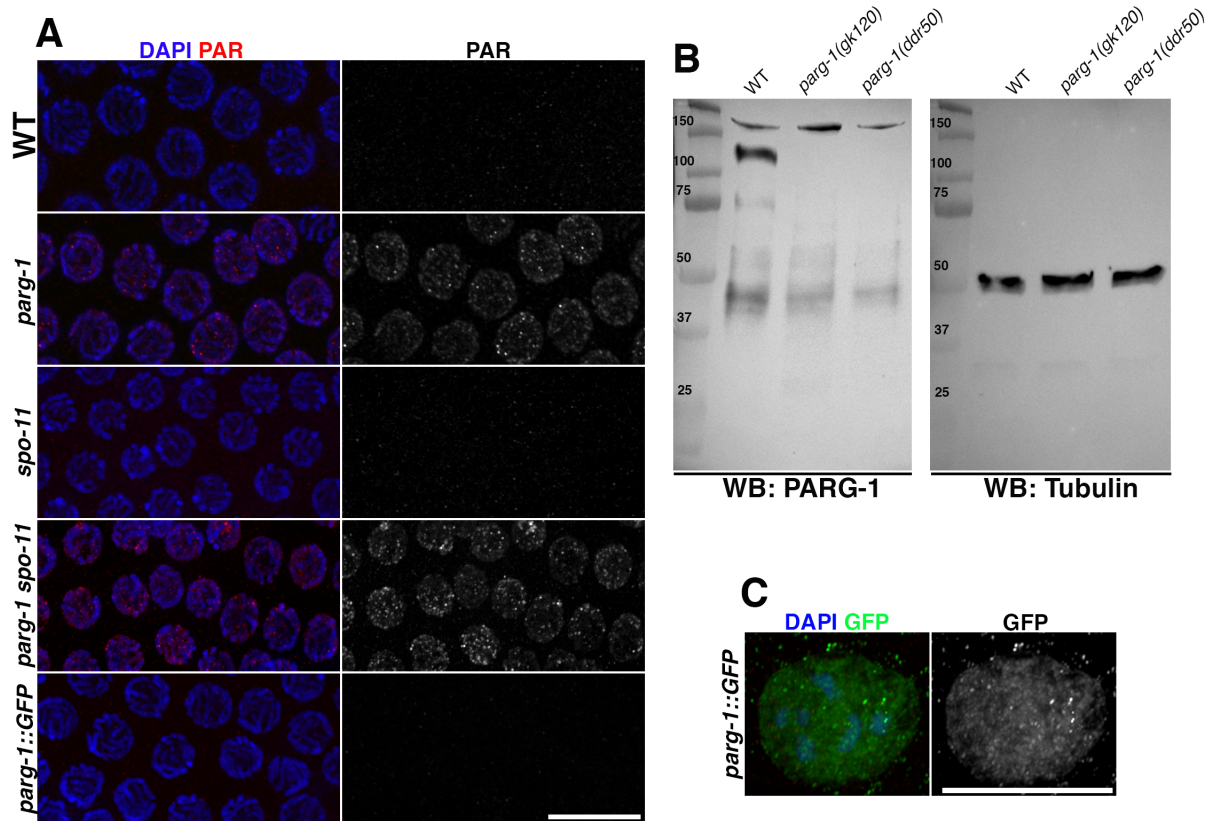

**Supplementary Figure 1. PAR accumulates in absence of endogenous DSBs. (A)** Immunostaining analysis showing accumulation of PAR in *parg-1* mutants even in absence of SPO-11-induced DSBs. *parg-1::GFP* does not accumulate PAR, indicating functionality of the fusion protein. Scale bar 10  $\mu$ m. Analysis was performed in biological duplicates. **(B)** Western blot with anti-PARG-1 antibody on whole cell extract in WT, *parg-1(gk120)* and *parg-1(DDR50)*, showing that *parg-1* mutants are null. Tubulin was used as loading control. Analysis was performed in biological duplicates. **(C)** Representative image of a diakinesis nucleus from *parg-1::GFP* worms displaying mostly nucleoplasmic localization. Scale bar 5  $\mu$ m. Analysis was performed in biological duplicates.



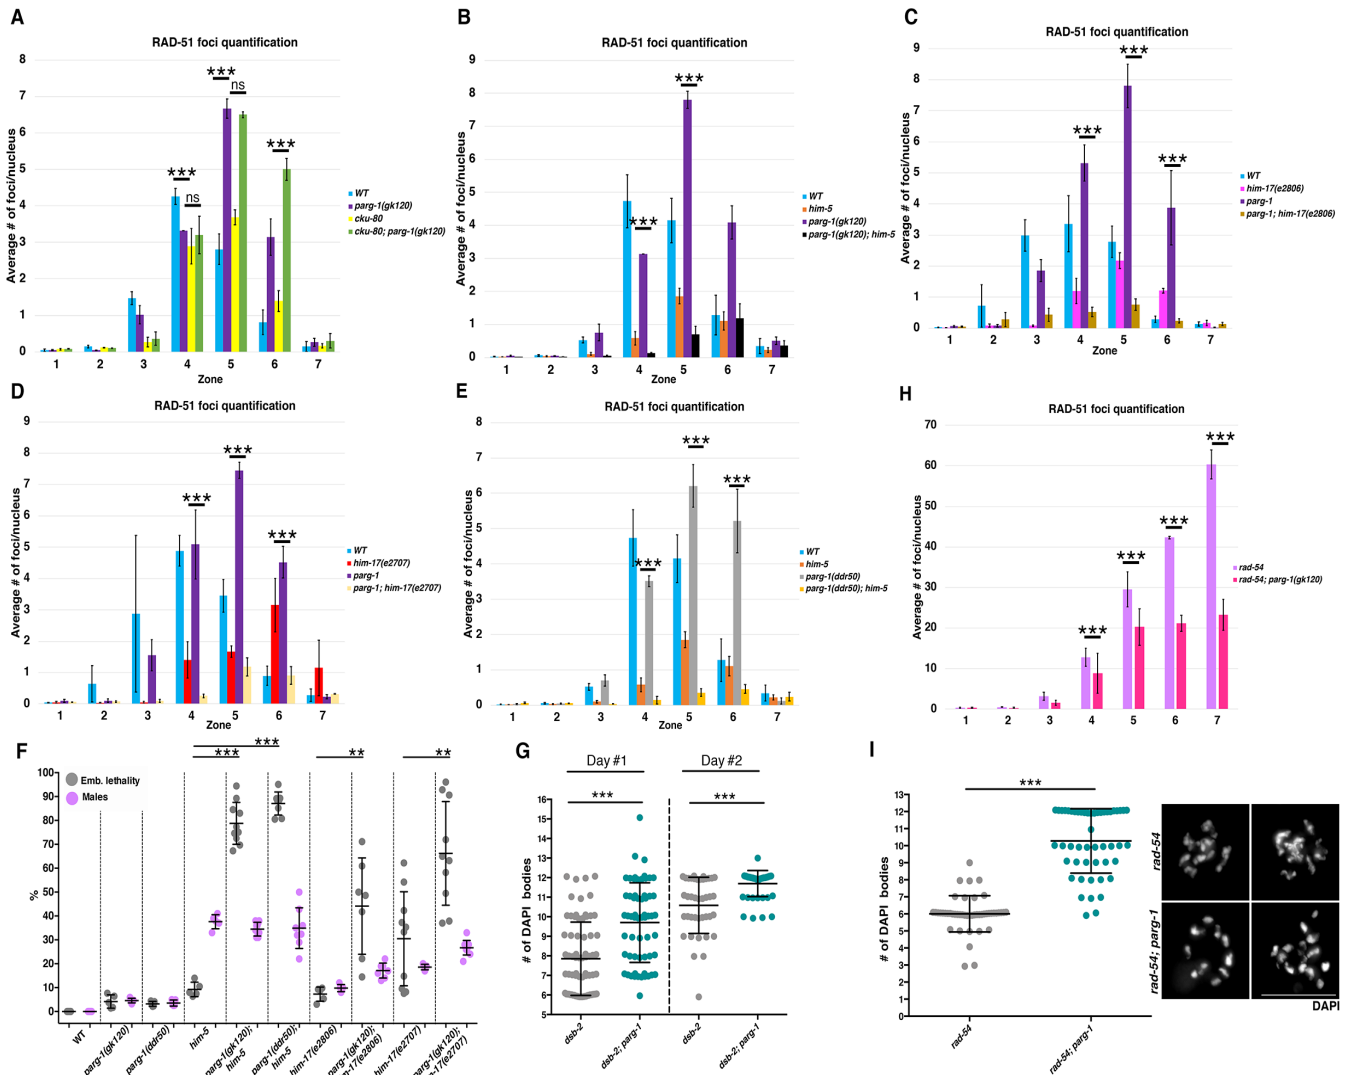

**Supplementary Figure 3. Abrogation of *parg-1* function causes reduced amounts of RAD-51 foci in mutants with reduced DSBs and *rad-54*-deficient worms. (A-E)** Quantification of RAD-51 foci throughout the germline in the indicated genotypes. Error bars indicate S.E.M. Statistical analysis was performed using non-parametric two-tailed Mann-Whitney test. (\*\*\*)  $p < 0.0001$ ; ns = not significant). **(F)** Removal of *parg-1* causes synthetic lethality in DSB-defective mutants. Error bars indicate SD. (*him-5* vs *parg-1(gk120)*; *him-5*,  $p = 0.0007$  - *him-5* vs *parg-1(DDR50)*; *him-5*,  $p = 0.00016$  - *him-17(e2806)* vs *parg-1*; *him-17(e2806)*,  $p = 0.0025$  - *him-17(e2707)* vs *parg-1*; *him-17(e2707)*,  $p = 0.0015$ ). **(G)** The CO defects in *dsb-2* mutants are exacerbated by lack of PARG-1. Error bars indicate SD.

Statistical analysis was conducted by non-parametric two-tailed Mann-Whitney test ( $***p < 0.0001$ ). **(H)** Abrogation of *parg-1* function reduces RAD-51 foci numbers in the *rad-54* mutant. Error bars indicate S.E.M. Statistical analysis was performed with non-parametric two-tailed Mann-Whitney test. ( $***p < 0.0001$ ). **(I)** Removal of *parg-1* in *rad-54* mutants triggers formation of univalents and largely alleviates chromosome morphology in diakinesis nuclei. Error bars indicate SD. Scale bar 5  $\mu\text{m}$ . Statistical analysis was performed with non-parametric two-tailed Mann-Whitney test. ( $***p < 0.0001$ ).

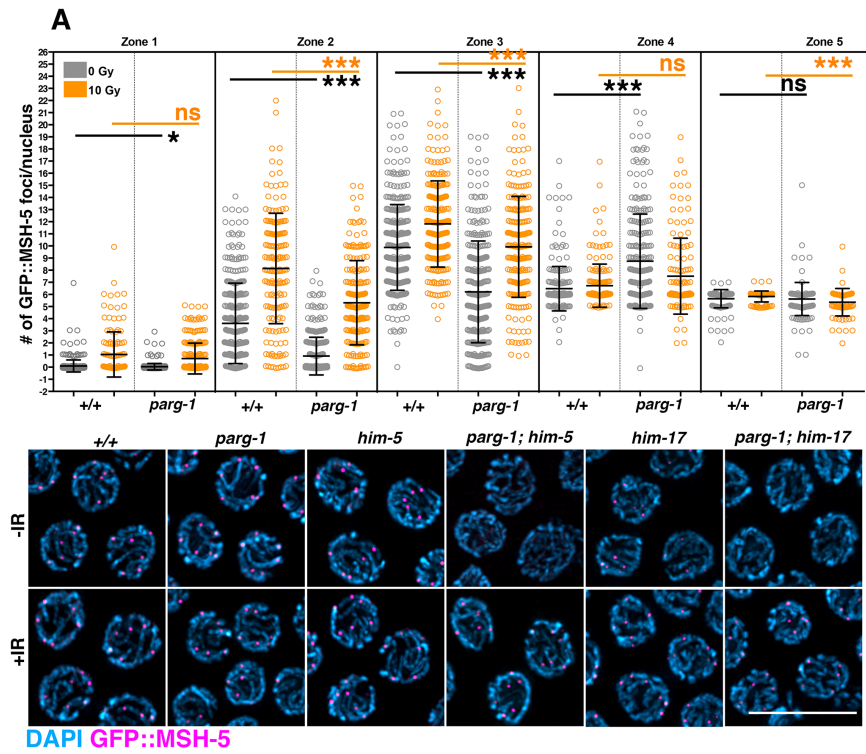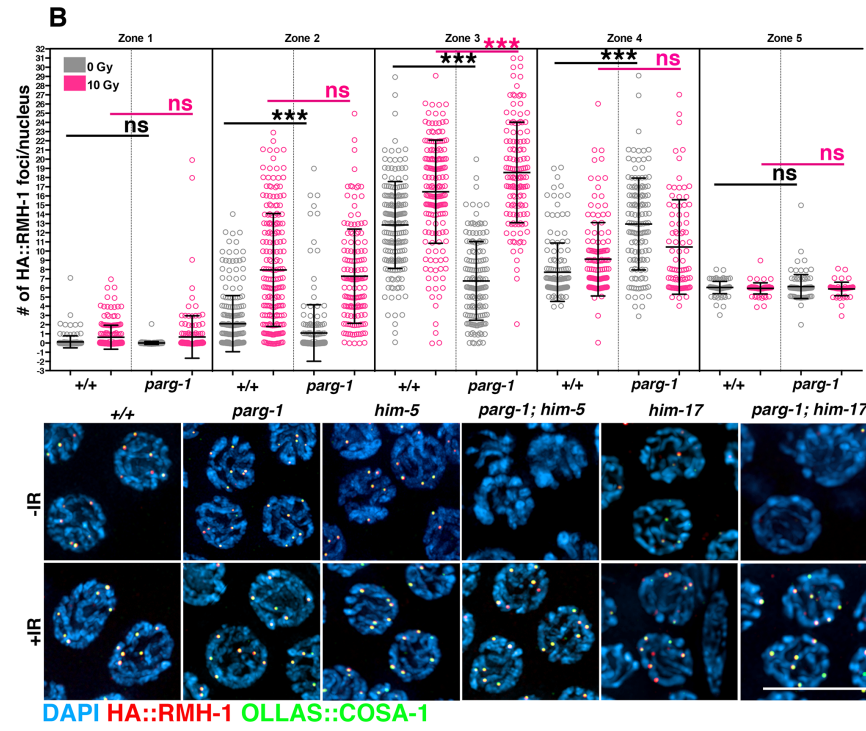

Supplementary Figure 4. Loading of MSH-5 and RMH-1 is delayed in *parg-1* mutants and it is severely impaired in *parg-1; him-5* and *parg-1; him-17* double mutants. (A) Top: quantification of GFP::MSH-5 foci number in controls and *parg-1* mutants. Note that *parg-1* mutants display a delayed accumulation of MSH-5. Bottom: late pachytene nuclei of

different genotypes stained for GFP (MSH-5) before and after IR. Scale bar 10  $\mu\text{m}$ . Error bars indicate SD. **(B)** Top: quantification of HA::RMH-1 foci number in controls and *parg-1* mutants. Note that as for MSH-5, *parg-1* mutants display a delayed accumulation of RMH-1 as well. Bottom: late pachytene nuclei of different genotypes stained for HA (RMH-1) and OLLAS (COSA-1) before and after IR. Scale bar 10  $\mu\text{m}$ . Error bars indicate SD. Statistical analysis was performed using non-parametric two-tailed Mann-Whitney test. (\*\* $p < 0.0001$ ; \* $p < 0.01$ ; ns= not significant).

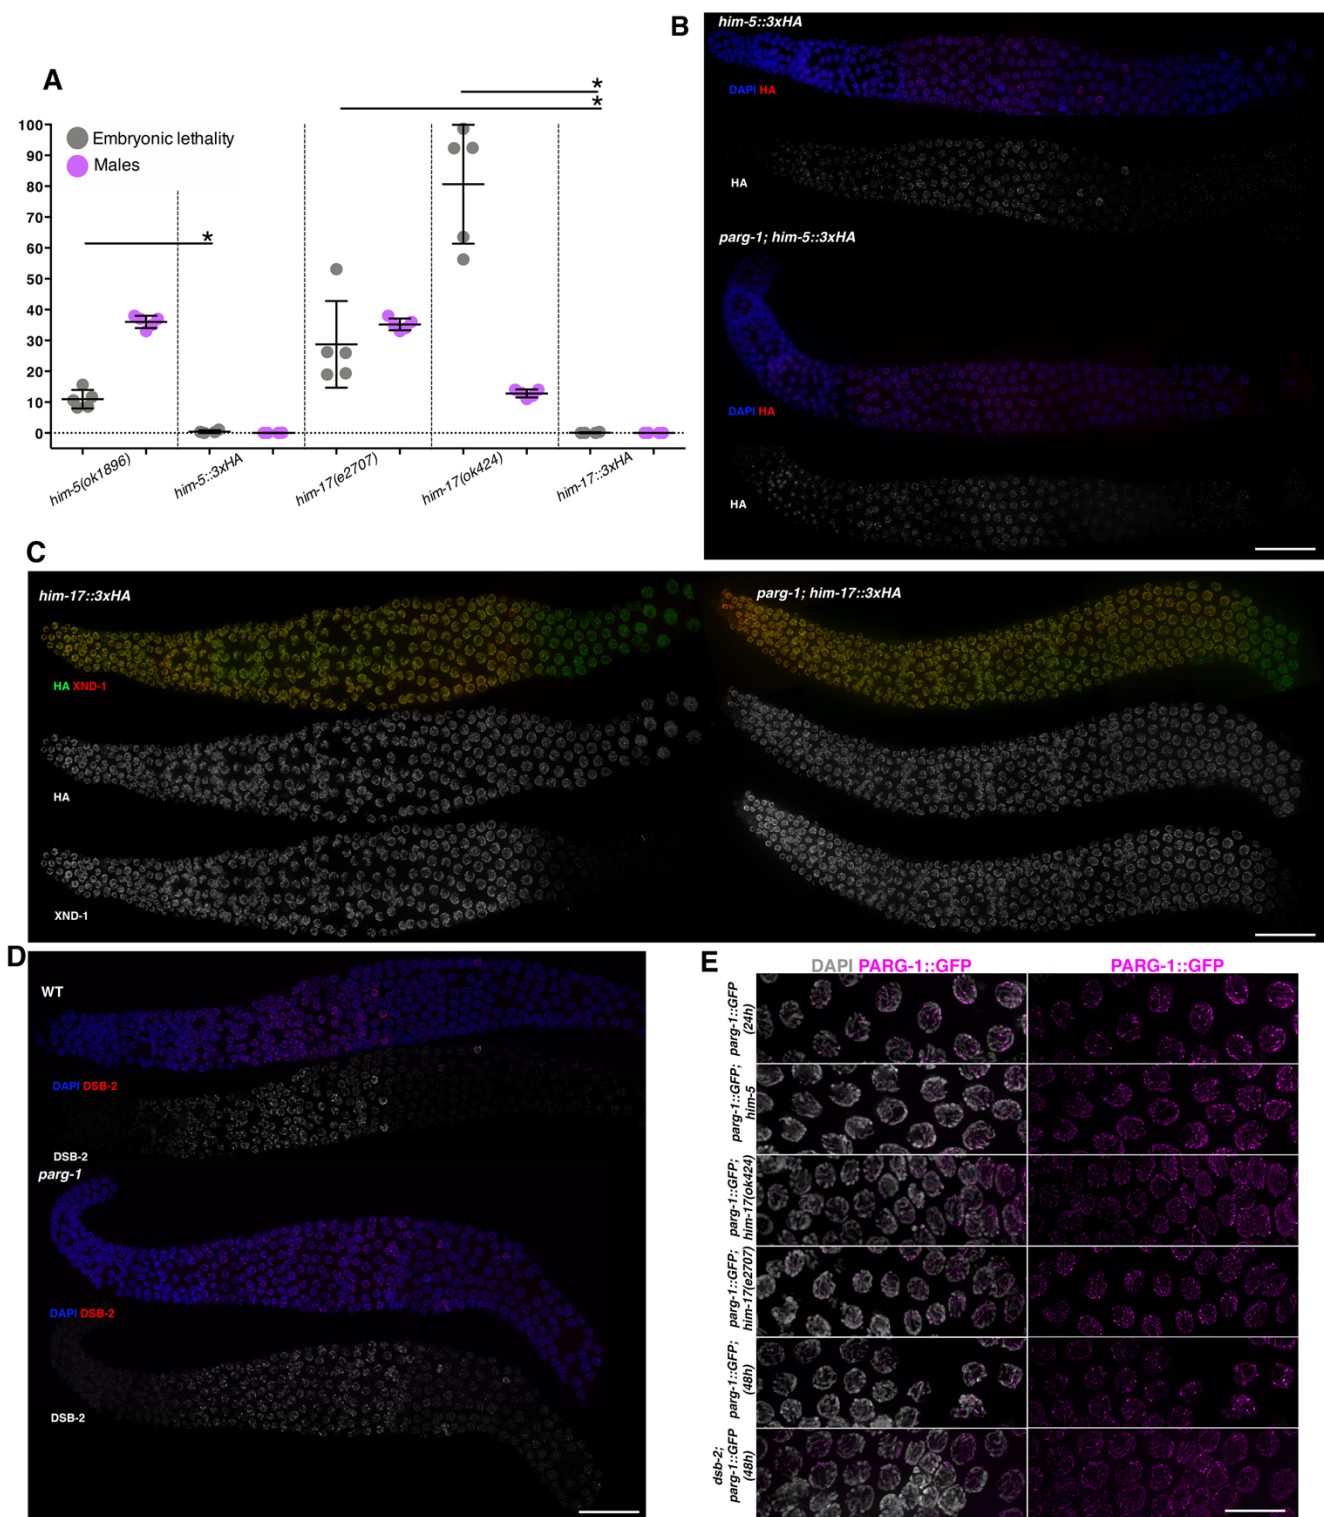

**Supplementary Figure 5. PARG-1 and pro-DSB factors display a mutually independent loading. (A)** Viability and male progeny assessment revealed full functionality of *him-5::3xHA* and *him-17::3xHA* tagged lines compared to respective mutant backgrounds. Error bars indicate SD. Statistical analysis was performed using non-parametric two-tailed



Mann-Whitney test. (\* $p < 0.01$ ). Number of worms scored: *him-5* (5), *him-5::3xHA* (4), *him-17(e2707)* (5), *him-17(ok424)* (5), *him-17::3xHA* (4). **(B)** HIM-5 shows normal loading in *parg-1* mutant germlines. Scale bar 20  $\mu\text{m}$ . Analysis was performed in biological duplicates. **(C)** HIM-17 and XND-1 do not display loading abnormalities in *parg-1* mutants. Scale bar 20  $\mu\text{m}$ . Analysis was performed in biological duplicates. **(D)** *parg-1* is not required for DSB-2 loading. Scale bar 20  $\mu\text{m}$ . Analysis was performed in biological duplicates. **(E)** Loading of PARG-1 is not dependent on *him-5*, *him-17* and *dsb-2*. Scale bar 20  $\mu\text{m}$ . Analysis was performed in biological duplicates.

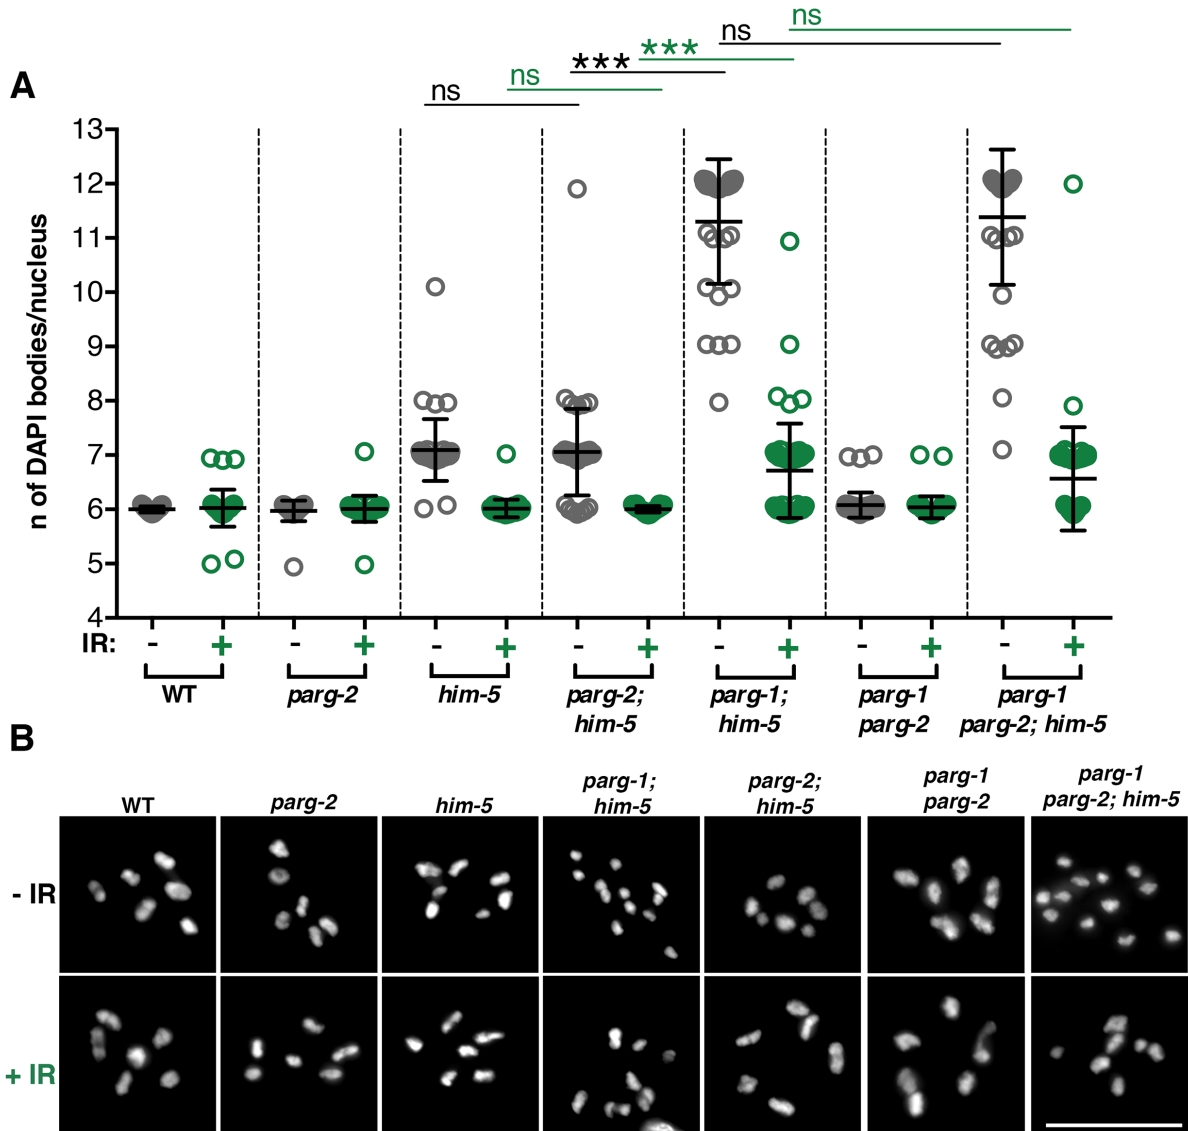

**Figure S6. Loss of *parg-2* does not cause synthetic phenotypes with *him-5* irrespectively of *parg-1*.** (A) Quantification of DAPI-bodies in diakinesis nuclei of the indicated genotypes before and after IR exposure. Error bars indicate SD. Statistical analysis was performed using non-parametric two-tailed Mann-Whitney test. (\*\*\*) $p < 0.0001$ ; *ns* = not significant). Number of nuclei scored is reported in Supplementary Table 2. (B) Representative images of diakinesis nuclei of the indicated genotypes stained with DAPI. Scale bar 5  $\mu\text{m}$ .

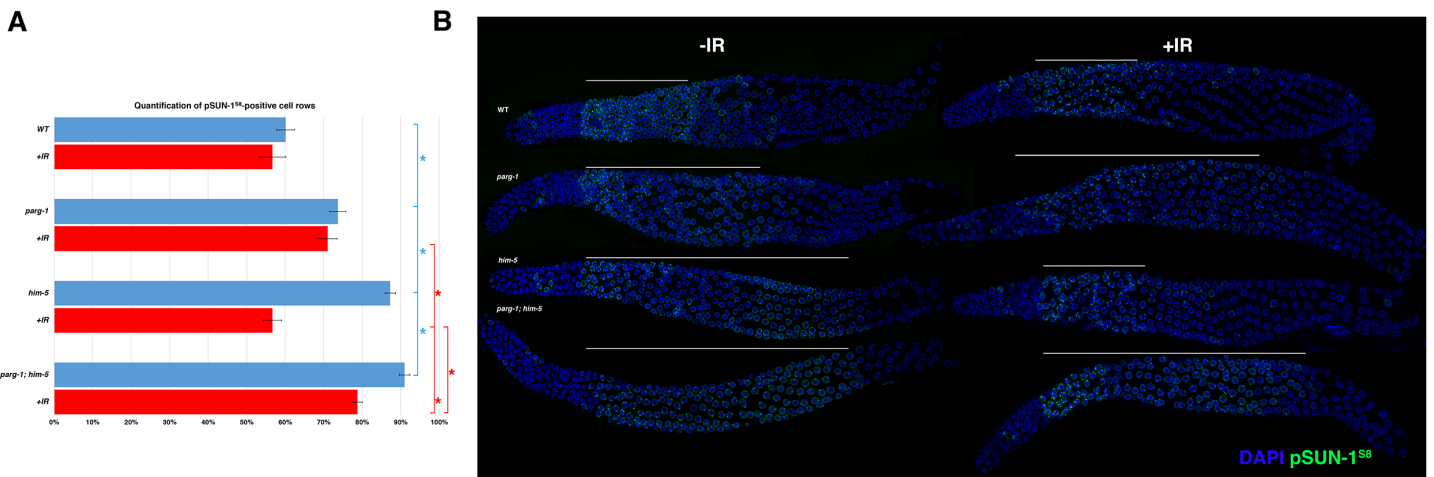

**Supplementary Figure 7. IR does not fully suppress accumulation of pSUN-1<sup>S8</sup> in *parg-1; him-5* double mutants. (A)** Quantification of pSUN-1<sup>S8</sup>-positive nuclei cell rows in the indicated genotypes before and after IR exposure. Error bars indicate S.E.M. Statistical analysis was performed using unpaired *t* test. (\**p* < 0.01). Number of gonads analysed (0 Gy-10Gy): WT (4-3), *parg-1* (4-4), *him-5* (3-5), *parg-1; him-5* (5-4). **(B)** Representative whole-mount gonads of the indicated genotypes before and after irradiation, stained for pSUN-1<sup>S8</sup> and DAPI. Scale bar 30 μm.

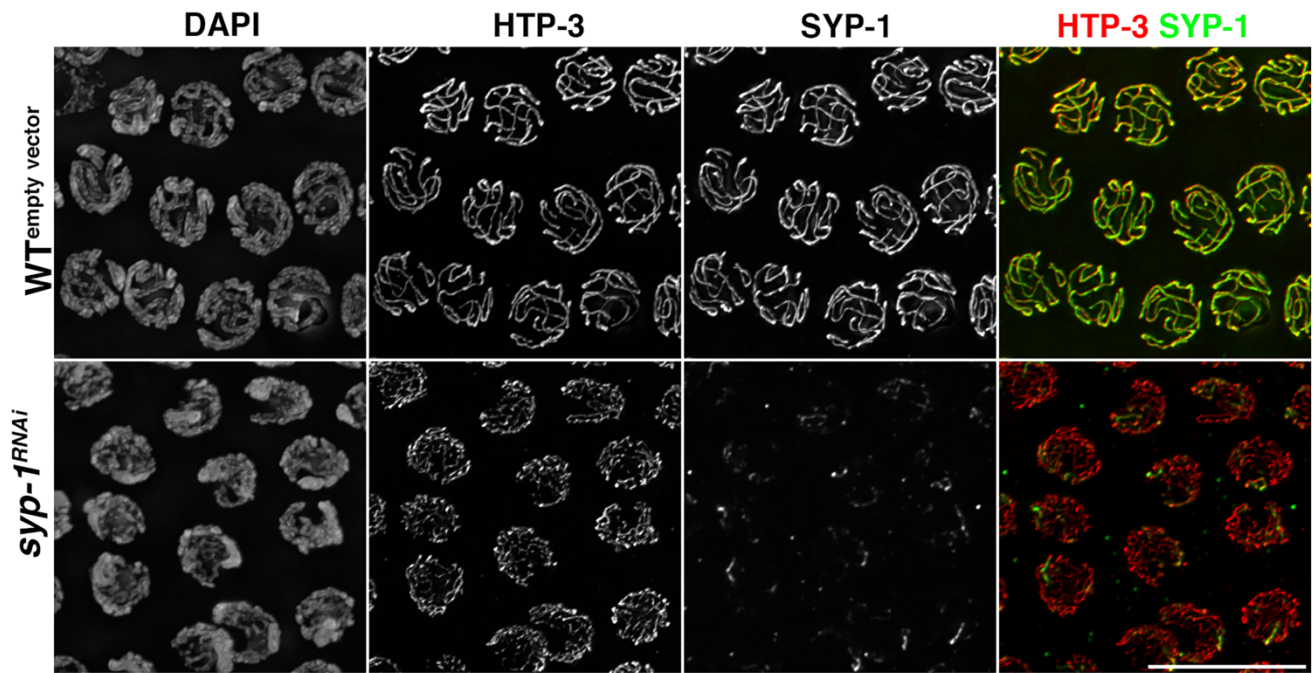

**Supplementary Figure 8. Rabbit anti-SYP-1 antibody is specific.** Immunostaining analysis in control worms (empty vector) and upon *syp-1RNAi* shows specific detection of SYP-1. Note that SYP-1 is robustly detected along the SC together with HTP-3 but the signal is dramatically reduced under (incomplete) *syp-1RNAi*. Scale bar 10  $\mu\text{m}$ . Analysis was performed in biological duplicates.

**Supplementary Table 1.**

| <b>Number of nuclei analysed for GFP::MSH-5 quantification</b> |        |        |        |        |        |
|----------------------------------------------------------------|--------|--------|--------|--------|--------|
| Genotype                                                       | Zone 1 | Zone 2 | Zone 3 | Zone 4 | Zone 5 |
| <i>GFP::msh-5</i>                                              | 179    | 142    | 159    | 117    | 72     |
| <i>GFP::msh-5 +IR</i>                                          | 130    | 170    | 212    | 165    | 105    |
| <i>GFP::msh-5 parg-1</i>                                       | 207    | 178    | 176    | 143    | 58     |
| <i>GFP::msh-5 parg-1 +IR</i>                                   | 234    | 194    | 211    | 129    | 74     |
| <i>GFP::msh-5; him-5</i>                                       | 276    | 239    | 205    | 170    | 107    |
| <i>GFP::msh-5; him-5 +IR</i>                                   | 235    | 246    | 219    | 149    | 82     |
| <i>GFP::msh-5 parg-1; him-5</i>                                | 195    | 166    | 141    | 114    | 79     |
| <i>GFP::msh-5 parg-1; him-5 +IR</i>                            | 225    | 202    | 190    | 126    | 63     |
| <i>GFP::msh-5; him-17</i>                                      | 379    | 359    | 268    | 215    | 131    |
| <i>GFP::msh-5; him-17 +IR</i>                                  | 181    | 178    | 162    | 100    | 76     |
| <i>GFP::msh-5 parg-1; him-17</i>                               | 454    | 417    | 329    | 251    | 230    |
| <i>GFP::msh-5 parg-1; him-17 +IR</i>                           | 182    | 147    | 134    | 84     | 54     |
| <b>Number of nuclei analysed for HA::RMH-1 quantification</b>  |        |        |        |        |        |
| Genotype                                                       | Zone 1 | Zone 2 | Zone 3 | Zone 4 | Zone 5 |
| <i>HA::rmh-1</i>                                               | 196    | 224    | 181    | 153    | 101    |
| <i>HA::rmh-1 +IR</i>                                           | 204    | 195    | 171    | 134    | 79     |
| <i>HA::rmh-1; parg-1</i>                                       | 209    | 198    | 148    | 130    | 106    |
| <i>HA::rmh-1; parg-1 +IR</i>                                   | 174    | 141    | 131    | 87     | 60     |
| <i>HA::rmh-1; him-5</i>                                        | 201    | 218    | 172    | 135    | 80     |
| <i>HA::rmh-1; him-5 +IR</i>                                    | 201    | 123    | 118    | 78     | 50     |
| <i>HA::rmh-1; parg-1; him-5</i>                                | 209    | 168    | 136    | 89     | 78     |
| <i>HA::rmh-1; parg-1; him-5 +IR</i>                            | 226    | 175    | 141    | 102    | 59     |
| <i>HA::rmh-1; him-17</i>                                       | 226    | 207    | 158    | 101    | 85     |
| <i>HA::rmh-1; him-17 +IR</i>                                   | 162    | 144    | 96     | 86     | 68     |
| <i>HA::rmh-1; parg-1; him-17</i>                               | 189    | 155    | 138    | 99     | 92     |
| <i>HA::rmh-1; parg-1; him-17 +IR</i>                           | 234    | 215    | 155    | 97     | 75     |

**Supplementary Table 2.**

| <b>Number of diakinesis nuclei analysed (from Fig. 4)</b>       |      |       |
|-----------------------------------------------------------------|------|-------|
| Genotype                                                        | 0 Gy | 10 Gy |
| WT                                                              | 75   | 28    |
| <i>parg-1(gk120)</i>                                            | 127  | 43    |
| <i>parg-1(DDR50)</i>                                            | 57   | 56    |
| <i>him-5</i>                                                    | 85   | 38    |
| <i>parg-1(gk120); him-5</i>                                     | 92   | 44    |
| <i>parg-1(DDR50); him-5</i>                                     | 51   | 62    |
| <i>him-17(e2806)</i>                                            | 161  | 67    |
| <i>parg-1(gk120); him-17(e2806)</i>                             | 135  | 94    |
| <i>him-17(e2707)</i>                                            | 105  | 52    |
| <i>parg-1(gk120); him-17(e2707)</i>                             | 119  | 35    |
| <i>spo-11</i>                                                   | 49   | 60    |
| <i>parg-1 spo-11</i>                                            | 43   | 62    |
| <b>Number of diakinesis nuclei analysed (from Fig. 6)</b>       |      |       |
| Genotype                                                        | n    | -     |
| WT                                                              | 40   | -     |
| <i>parg-1(cd)</i>                                               | 56   | -     |
| <i>him-5</i>                                                    | 36   | -     |
| <i>parg-1(cd); him-5</i>                                        | 42   | -     |
| <i>parg-1(gk120); him-5</i>                                     | 44   | -     |
| <i>parp-1; parg-1(gk120); him-5</i>                             | 33   | -     |
| <i>parp-2; parg-1(gk120); him-5</i>                             | 35   | -     |
| <i>parp-1; parp-2; parg-1(gk120); him-5</i>                     | 51   | -     |
| <b>Number of diakinesis nuclei analysed (from Supp. Fig. 6)</b> |      |       |
| Genotype                                                        | 0 Gy | 10 Gy |
| WT                                                              | 33   | 40    |
| <i>parg-2</i>                                                   | 34   | 40    |
| <i>him-5</i>                                                    | 44   | 45    |
| <i>parg-2; him-5</i>                                            | 57   | 53    |
| <i>parg-1; him-5</i>                                            | 33   | 59    |
| <i>parg-1 parg-2</i>                                            | 51   | 53    |
| <i>parg-1 parg-2; him-5</i>                                     | 44   | 49    |

**Supplementary Table 3.**

| Number of nuclei scored for quantification of OLLAS::COSA-1 foci |      |            |             |
|------------------------------------------------------------------|------|------------|-------------|
| Genotype                                                         | 0 Gy | 10 Gy (8h) | 10 Gy (17h) |
| <i>OLLAS::cosa-1</i>                                             | 130  | 170        | 118         |
| <i>OLLAS::cosa-1; parg-1</i>                                     | 119  | 101        | 102         |
| <i>OLLAS::cosa-1; him-5</i>                                      | 109  | 128        | 156         |
| <i>OLLAS::cosa-1; parg-1; him-5</i>                              | 206  | 113        | 132         |
| Number of nuclei scored for quantification of synapsis           |      |            |             |
| Genotype                                                         | 0 Gy | 10 Gy (8h) | 10 Gy (17h) |
| <i>OLLAS::cosa-1</i>                                             | 108  | 177        | 149         |
| <i>OLLAS::cosa-1; parg-1</i>                                     | 116  | 112        | 125         |
| <i>OLLAS::cosa-1; him-5</i>                                      | 116  | 140        | 184         |
| <i>OLLAS::cosa-1; parg-1; him-5</i>                              | 234  | 131        | 160         |

**Supplementary Table 4.**

**Chromosome I**

| Genetic Interval     | AB         | BC       | CD           | DE          | EF         | FG       | GH          |
|----------------------|------------|----------|--------------|-------------|------------|----------|-------------|
| <b>Genotype WT</b>   | 22.54 (15) | 5.9 (4)  | 13.4 (9)     | 7.46 (5)    | 11.94 (8)  | 7.46 (5) | 31.43 (21)  |
| <i>parg-1(gk120)</i> | 4.61** (3) | 3.07 (2) | 29.23** (23) | 21.53* (19) | 15.38 (12) | 3.07 (3) | 30.76 (27)  |
| <i>parg-1(cd)</i>    | 19.54 (17) | 8.04 (7) | 14.94 (13)   | 2.29 (2)    | 9.19 (9)   | 5.74 (5) | 40.22* (35) |

The number of COs per interval is shown in brackets. The change in crossover distribution between *wild type* and *parg-1(gk120)* is statistically significant ( $\chi^2 = 51.845$ ,  $p < 0.001$ ). Crossover distribution is not significantly different between wild type and *parg-1(cd)* mutants ( $\chi^2 = 6.83$ ,  $p = 0.3369$ ). \*, \*\* refer to statistical significance in recombination frequency within the interval between *wild type* and *parg-1(gk120)* (significance level for  $p < 0.05$ , \*  $p < 0.05$  - \*\*  $p < 0.001$ )

**Chromosome V**

| Genetic Interval     | AB           | BC          | CD           | DE          |
|----------------------|--------------|-------------|--------------|-------------|
| <b>Genotype WT</b>   | 35.48 (22)   | 6.45(4)     | 6.45 (4)     | 51.61 (32)  |
| <i>parg-1(gk120)</i> | 11.84** (19) | 15.41* (21) | 39.52** (51) | 33.54* (50) |
| <i>parg-1(cd)</i>    | 28.78 (19)   | 13.63 (9)   | 6.06 (4)     | 51.51 (34)  |

The number of COs per interval is shown in brackets. The change in crossover distribution between *wild type* and *parg-1(gk120)* is statistically significant ( $\chi^2 = 234.97$ ,  $p < .001$ ). Crossover distribution is not significantly different between wild type and *parg-1(cd)* mutants ( $\chi^2 = 6.0638$ ,  $p = 0.1085$ ). \*, \*\* refer to statistical significance in recombination frequency within the interval between *wild type* and *parg-1(gk120)* (significance level for  $p < 0.05$ , \*  $p < 0.05$  - \*\*  $p < 0.001$ )

**Supplementary Table 5**

| Number of nuclei scored for quantification of RAD-51 foci |        |        |        |        |        |        |        |
|-----------------------------------------------------------|--------|--------|--------|--------|--------|--------|--------|
| Genotype                                                  | Zone 1 | Zone 2 | Zone 3 | Zone 4 | Zone 5 | Zone 6 | Zone 7 |
| WT                                                        | 222    | 196    | 158    | 137    | 146    | 121    | 117    |
| <i>parg-1</i>                                             | 130    | 170    | 122    | 114    | 105    | 79     | 93     |
| <i>spo-11</i>                                             | 239    | 233    | 218    | 199    | 156    | 155    | 93     |
| <i>spo-11 parg-1</i>                                      | 197    | 211    | 200    | 185    | 132    | 102    | 78     |
| <i>him-5</i>                                              | 257    | 250    | 182    | 191    | 181    | 145    | 79     |
| <i>parg-1(gk120); him-5</i>                               | 180    | 220    | 177    | 172    | 103    | 153    | 97     |
| <i>him-17(e2806)</i>                                      | 273    | 233    | 238    | 255    | 254    | 201    | 124    |
| <i>parg-1(gk120); him-17(e2806)</i>                       | 199    | 198    | 150    | 126    | 166    | 143    | 88     |
| <i>him-17(e2707)</i>                                      | 204    | 197    | 171    | 174    | 128    | 78     | 55     |
| <i>parg-1(gk120); him-17(e2707)</i>                       | 172    | 189    | 154    | 135    | 107    | 80     | 78     |
| <i>parg-1(DDR50)</i>                                      | 196    | 226    | 158    | 153    | 145    | 136    | 102    |
| <i>parg-1(DDR50); him-5</i>                               | 208    | 257    | 188    | 175    | 156    | 115    | 88     |
| <i>rad-54</i>                                             | 137    | 167    | 109    | 97     | 99     | 87     | 83     |
| <i>rad-54; parg-1</i>                                     | 129    | 181    | 157    | 107    | 90     | 72     | 69     |
| <i>cku-80</i>                                             | 136    | 254    | 219    | 208    | 184    | 166    | 149    |
| <i>cku-80; parg-1(gk120)</i>                              | 207    | 277    | 206    | 181    | 141    | 116    | 116    |

**Supplementary Table 6.**

| Genotype                                                         | Source               | Id. number |
|------------------------------------------------------------------|----------------------|------------|
| <i>parp-1(DDR31) I.</i>                                          | This study           | NSV167     |
| <i>rmh-1(jf172[HA::rmh-1]) I.</i>                                | This study           | NSV240     |
| <i>htp-3::TEV::eGFP::myc::3xFLAG I.</i>                          | CGC                  | JH4008     |
| <i>rad-54(tm1268)/hT2[bli-4(e937) let-?(q782) qls48] (I;III)</i> | Jantsch lab          | NSV187     |
| <i>parp-2(ok344) II.</i>                                         | CGC                  | VC1171     |
| <i>dsb-2(me96) II.</i>                                           | Villeneuve lab       | AV477      |
| <i>GFP::cosa-1 II.</i>                                           | Villeneuve lab       | AV630      |
| <i>cosa-1(tm3298)/qC1[dpy-19(e1259) glp-1(q339) qls26] III.</i>  | Villeneuve lab       | AV590      |
| <i>oxT1574 II; unc-119(ed3) III.</i>                             | CGC                  | EG7875     |
| <i>cosa-1(DDR12[OLLAS::cosa-1]) III.</i>                         | Janisiw et al.; 2018 | NSV97      |
| <i>parg-1(gk120) IV.</i>                                         | CGC                  | VC130      |
| <i>parg-1(DDR50) IV.</i>                                         | This study           | NSV277     |
| <i>parg-2(DDR20) IV.</i>                                         | This study           | NSV140     |
| <i>parg-1(DDR3[parg-1::GFP]) IV.</i>                             | This study           | NSV25      |
| <i>parg-1(gk120) parg-2(DDR20) IV.</i>                           | This study           | NSV126     |
| <i>msh-5(DDR22[GFP::msh-5]) IV</i>                               | Janisiw et al.; 2018 | NSV129     |
| <i>parg-1(DDR29[parg-1<sup>E554,555A</sup>::GFP]) IV.</i>        | This study           | NSV162     |
| <i>parg-1(DDR34[parg-1<sup>E554,555A</sup>]) IV.</i>             | This study           | NSV177     |
| <i>parg-1<sup>gk120</sup>(DDR51) IV in CB4856.</i>               | This study           | NSV278     |
| <i>him-5(ok1896) V.</i>                                          | CGC                  | RB1562     |
| <i>him-17(e2806) V.</i>                                          | This study           | NSV169     |
| <i>him-17(e2707) V.</i>                                          | This study           | NSV170     |



|                                                                                                               |              |        |
|---------------------------------------------------------------------------------------------------------------|--------------|--------|
| <i>him-17(DDR37[him-17::3xHA]) V.</i>                                                                         | This study   | NSV205 |
| <i>syp-2(ok307)7nT1</i><br><i>[unc-?(n754) let-?(m435)] (IV;V).</i>                                           | CGC          | AV276  |
| <i>parp-2 (ok344) II; parg-1(gk120) IV.</i>                                                                   | This study   | NSV09  |
| <i>spo-11(ok79)/nT1</i><br><i>[unc-?(n754) let-?] (IV;V).</i>                                                 | CGC          | AV106  |
| <i>syp-3(ok758) I; ieSi11 II; unc-119(ed3) III.</i>                                                           | CGC          | CA1218 |
| <i>parg-1(gk120) IV; him-5(ok1896) V.</i>                                                                     | This study   | NSV56  |
| <i>parg-1(gk120) spo-11(ok79)/nT1</i><br><i>[unc-?(n754) I et-?] (IV;V).</i>                                  | This study   | NSV74  |
| <i>parg-1(gk120) with Hawaiian chromosome V</i>                                                               | This study   | NSV121 |
| <i>parg-1(DDR3[parg-1::GFP]) IV;</i><br><i>him-5(ok1896) V.</i>                                               | This study   | NSV124 |
| <i>cosa-1(DDR12[OLLAS::cosa-1]) III;</i><br><i>parg-1(gk120) IV.</i>                                          | This study   | NSV137 |
| <i>cosa-1(DDR12[OLLAS::cosa-1]) III;</i><br><i>him-5(ok1896) V.</i>                                           | This study   | NSV138 |
| <i>cosa-1(DDR12[OLLAS::cosa-1]) III;</i><br><i>parg-1(gk120) IV; him-5(ok1896) V.</i>                         | This study   | NSV139 |
| <i>cku-80(ok861) III.</i>                                                                                     | CGC          | RB964  |
| <i>cosa-1(DDR12[OLLAS::cosa-1]) III;</i><br><i>parg-1(gk120); him-5(ok1896)/nT1[unc-?(n754) let-?] (IV</i>    | This study   | NSV155 |
| <i>parg-1(gk120)</i><br><i>msh-5(DDR22[GFP::msh-5]) IV</i>                                                    | This study   | NSV157 |
| <i>parg-1(DDR3[parg-1::GFP]) IV;</i><br><i>syp-2(ok307)7nT1 [unc-?(n754) let-?(m435)] (IV;V).</i>             | This study   | NSV160 |
| <i>dsb-2(me96) II; parg-1(gk120) IV.</i>                                                                      | Yanowitz lab | QP1367 |
| <i>mre-11(iow1)/nT1 [qls51] (IV;V).</i>                                                                       | CGC          | SSM2   |
| <i>parg-1(gk120) IV; him-17(e2806) V.</i>                                                                     | Yanowitz lab | QP1374 |
| <i>parg-1(gk120) IV;</i><br><i>mre-11(iow1)/nT1 [qls51] (IV;V).</i>                                           | Yanowitz lab | QP1377 |
| <i>parp-1(DDR31) I; parp-2(ok344) II.</i>                                                                     | This study   | NSV175 |
| <i>parg-1(DDR34[parg-1<sup>E554,555A</sup>]) IV</i><br><i>in CB4856.</i>                                      | This study   | NSV178 |
| <i>rmh-1(jf54)/hT2 [bli-4(e937) let-?(q782)</i><br><i>qls48] (I;III).</i>                                     | This study   | NSV180 |
| <i>parg-1(DDR34[parg-1<sup>E554,555A</sup>::GFP]) IV;</i><br><i>him-5(ok1896) V.</i>                          | This study   | NSV181 |
| <i>com-1(t1626) unc-32(e189)/hT2</i><br><i>[bli-4(e937) let-?(q782) qls48] (I;III).</i>                       | This study   | NSV182 |
| <i>parp-1(DDR31) I; parg-1(gk120) IV.</i>                                                                     | This study   | NSV184 |
| <i>cosa-1(tm3298)/qC1[dpy-19(e1259)</i><br><i>glp-1(q339) qls26] III; parg-1(DDR3[parg-1::GFP]) IV.</i>       | This study   | NSV186 |
| <i>parg-1(DDR34[parg-1<sup>E554,555A</sup>]) IV;</i><br><i>him-5(ok1896) V.</i>                               | This study   | NSV190 |
| <i>com-1(t1626) unc-32(e189)/hT2</i><br><i>[bli-4(e937) let-?(q782) qls48] (I;III); parg-1(gk120) IV.</i>     | This study   | NSV194 |
| <i>him-17(ok424)/nT1 [unc-?(n754) let-?]</i><br><i>(IV;V).</i>                                                | This study   | NSV196 |
| <i>parp-1(DDR31) I; parp-2(ok344) II;</i><br><i>parg-1(gk120) IV.</i>                                         | This study   | NSV199 |
| <i>parg-1(gk120) IV;</i><br><i>him-17(DDR37[him-17::3xHA]) V.</i>                                             | This study   | NSV206 |
| <i>parg-1(gk120)/nT1 [unc-?(n754) let-?]</i><br><i>(IV;V).; him-17(ok424)/nT1 [unc-?(n754) let-?] (IV;V).</i> | This study   | NSV209 |

|                                                                                                                                                                                               |            |        |
|-----------------------------------------------------------------------------------------------------------------------------------------------------------------------------------------------|------------|--------|
| <i>parg-1(gk120)/nT1 [unc-?(n754) let-?]</i><br><i>(IV;V).; him-17(e2707)/nT1 [unc-?(n754) let-?]</i> (IV;V).                                                                                 | This study | NSV236 |
| <i>msh-5(DDR22[GFP::msh-5]) IV;</i><br><i>him-5(ok1896) V.</i>                                                                                                                                | This study | NSV241 |
| <i>msh-5(DDR22[GFP::msh-5]) IV;</i><br><i>him-17(e2707) V.</i>                                                                                                                                | This study | NSV242 |
| <i>parp-2(ok344) II; parg-1(gk120) IV;</i><br><i>him-5(ok1896) V.</i>                                                                                                                         | This study | NSV244 |
| <i>him-17(e2707)/nT1 [unc-?(n754) let-?]</i><br><i>(IV;V).</i>                                                                                                                                | This study | NSV246 |
| <i>msh-5(DDR22[GFP::msh-5])/nT1</i><br><i>[unc-?(n754) let-?] (IV;V); him-17(e2707)/nT1</i><br><i>[unc-?(n754) let-?] (IV;V).</i>                                                             | This study | NSV247 |
| <i>him-5(DDR43[him-5::3xHA]) V.</i>                                                                                                                                                           | This study | NSV250 |
| <i>parg-1(gk120) IV;</i><br><i>him-5(DDR43[him-5::3xHA]) V.</i>                                                                                                                               | This study | NSV252 |
| <i>rmh-1(jf172[HA::rmh-1]);</i><br><i>cosa-1(DDR12[OLLAS::cosa-1]) III; parg-1(gk120) IV.</i>                                                                                                 | This study | NSV253 |
| <i>parg-1(gk120)</i><br><i>msh-5(DDR22[GFP::msh-5])/nT1 [unc-?(n754) let-?]</i><br><i>(IV;V); him-17(e2707)/nT1 [unc-?(n754) let-?]</i> (IV;V).                                               | This study | NSV254 |
| <i>htp-3(tm3655)/hT2 [bli-4(e937) let-?(q782) qIs48] (I;III).</i>                                                                                                                             | This study | NSV255 |
| <i>rmh-1(jf172[HA::rmh-1]);</i><br><i>cosa-1(DDR12[OLLAS::cosa-1]) III; him-5(ok1896) V.</i>                                                                                                  | This study | NSV256 |
| <i>rmh-1(jf172[HA::rmh-1]);</i><br><i>cosa-1(DDR12[OLLAS::cosa-1]) III; parg-1(gk120) IV;</i><br><i>him-5(ok1896) V.</i>                                                                      | This study | NSV257 |
| <i>rmh-1(jf172[HA::rmh-1]) I;</i><br><i>cosa-1(DDR12[OLLAS::cosa-1]) III.</i>                                                                                                                 | This study | NSV258 |
| <i>parg-1(DDR3[parp-1::GFP]) IV;</i><br><i>him-5(DDR43[him-5::3xHA]) V.</i>                                                                                                                   | This study | NSV262 |
| <i>htp-3(tm3655)/hT2 [bli-4(e937) let-?(q782) qIs48] (I;III);</i><br><i>parg-1(DDR3[parp-1::GFP]) IV.</i>                                                                                     | This study | NSV265 |
| <i>parg-1(DDR3[parp-1::GFP]) IV;</i><br><i>him-17(DDR37[him-17::3xHA]) V.</i>                                                                                                                 | This study | NSV267 |
| <i>parg-1(gk120)</i><br><i>msh-5(DDR22[GFP::msh-5]) IV; him-5(ok1896) V.</i>                                                                                                                  | This study | NSV273 |
| <i>rmh-1(jf172[HA::rmh-1]) I;</i><br><i>cosa-1(DDR12[OLLAS::cosa-1]) III; him-17(e2707) V.</i>                                                                                                | This study | NSV276 |
| <i>dsb-2(me96) II;</i><br><i>parg-1(DDR3[parp-1::GFP]) IV.</i>                                                                                                                                | This study | NSV280 |
| <i>parg-1(DDR3[parp-1::GFP]) IV;</i><br><i>him-17(e2707) V.</i>                                                                                                                               | This study | NSV281 |
| <i>rmh-1(jf172[HA::rmh-1]) I;</i><br><i>cosa-1(DDR12[OLLAS::cosa-1]) III; parg-1(gk120)/nT1</i><br><i>[unc-?(n754) let-?] (IV;V);</i><br><i>him-17(e2707)/nT1 [unc-?(n754) let-?] (IV;V).</i> | This study | NSV286 |
| <i>cosa-1(DDR12[OLLAS::cosa-1]) III;</i><br><i>parg-1(DDR3[parp-1::GFP]) IV.</i>                                                                                                              | This study | NSV292 |
| <i>parg-1(DDR3[parp-1::GFP])/nT1</i><br><i>[unc-?(n754) let-?] (IV;V); him-17(ok424)/nT1</i><br><i>[unc-?(n754) let-?] (IV;V).</i>                                                            | This study | NSV294 |

**List of primers used in the study.**

| <b>Primers Name</b> | <b>Sequences</b>                                               | <b>Amplicone</b>                                  |
|---------------------|----------------------------------------------------------------|---------------------------------------------------|
| PR185<br>PR186      | 5'-CCGTCACGACAAAATGCAGA-3'<br>5'-TGCCACCTTCTCCAATGACT-3'       | <i>parp-1(DDR31)</i><br>Deletion only             |
| PR301<br>PR302      | 5'-ACAGAGTACCACTTTCACCTTTCC-3'<br>5'-AATGCAACTTTTACTGCGCTCG-3' | <i>HA::rmh-1</i>                                  |
| PR305<br>PR306      | 5'-GCCTGCCATAGAACCACCTG-3'<br>5'-GGCGTCGCGACCTCTAGAAA-3'       | <i>rad-54(tm1268)</i>                             |
| PR011<br>PR012      | 5'-CGAGAAAACATCCTTCATTG-3'<br>5'-AAAGGATTAGCAACACCTTCAGA-3'    | <i>parp-2(ok344)</i>                              |
| PR100<br>PR101      | 5'-CAATGTCAAGTTCTCGGTGA-3'<br>5'-AAAATTTGCGAAAATGGTC-3'        | <i>cosa-1(tm3298)</i>                             |
| PR55<br>PR56        | 5'-ACTTTGTATTGGTCTCGCAC-3'<br>5'-AACCTGATTCGCTGCTGATA-3'       | <i>OLLAS::cosa-1</i>                              |
| PR005<br>PR006      | 5'-ATTTTGACAAGGCGAGAGGA-3'<br>5'-CGAGCTTACGTTTGATGCTT-3'       | <i>parg-1(gk120)</i><br>deletion only             |
| PR021<br>PR022      | 5'-GATTGCATTTACTGAGGGAAA-3'<br>5'-CATGATTTCAACTGTGACCA-3'      | <i>parg-1(gk120)</i><br>N2 only                   |
| PR027<br>PR028      | 5'-AAATGTAGAGCGAGATTTTG-3'<br>5'-TGAAATGGTCATGATCAGTT-3'       | <i>parg-2(DDR20)</i>                              |
| PR205<br>PR206      | 5'-TGCTAACTTACAGGCATGCT-3'<br>5'-TGCATGGATTGGTTTCACAC-3'       | <i>parg-1::GFP</i>                                |
| PR33<br>PR34        | 5'-GTTTTTCAGCAACCTTTTCTT-3'<br>5'-ATTATCATCACGGGGTAAGG-3'      | <i>GFP::msh-5</i>                                 |
| PR154<br>PR155      | 5'-TGTGGAGAACTTAAATTCCTGT-3'<br>5'-TCGCTTCCAGTTGTTTCATTT-3'    | <i>parg-1(cd)</i><br>digested with<br><i>AluI</i> |
| PR220<br>PR221      | 5'-CGGAGCTCAAATGAAAAGAGCAGC-3'<br>5'-CGATGCGACCAACTGTTTTTCG-3' | <i>him-5(ok1896)</i>                              |
| PR199<br>PR200      | 5'-TGGAGGGAGAAGAAGAAGAGT-3'<br>5'-TCAGAAACAACGCAACGAATT-3'     | <i>him-17::3xHA</i>                               |
| PR45<br>PR46        | 5'-AGAGTCAGCTTCGCATCTCC-3'<br>5'-AAAAGGAACTACGCCATCG-3'        | <i>syp-2(ok307)</i>                               |
| PR75<br>PR76        | 5'-CGTGGAACATTGCTTGA-3'<br>5'-GGACTGATGGAACCGAGAAA-3'          | <i>spo-11(ok79)</i>                               |
| PR203<br>PR204      | 5'-TTCGATGCCATACACCTTCA-3'<br>5'-TCAAAGTCATCCGAATCTATTGG-3'    | <i>him-17(ok424)</i>                              |
| PR102<br>PR103      | 5'-GACTGTTTTCCAGGCGTAAA-3'<br>5'-AATTACCCTTTTTGGGTTCA-3'       | <i>htp-3(tm3655)</i>                              |
| PR228<br>PR229      | 5'-TGAACAGTCACAGGAAATCAC-3'<br>5'-AGTTATATGCCCGAGTGTCC-3'      | <i>him-5::3xHA</i>                                |
| I, -19              | 5'-ATGCCAGTGATAAGGAACGG-3'<br>5'-TCACATCCCTTGTGATGAA-3'        | snp_F56C11                                        |
| I, -12              | 5'-TCGAAATCAGGGAAAAATTGA-3'<br>5'-ACGATTTTCGGGGAGTTTTT-3'      | snp_Y71G12                                        |
| I, -6               | 5'-GTTTTCACTTTTGCCGGTGT-3'<br>5'-TGAAGGCGCATATACAGCAG-3'       | pkP1052                                           |
| I, -1               | 5'-AAAATATCAGGAAAGAGTTTCGG-3'<br>5'-TTTAAAGATTAAGGGTGGAGCG-3'  | snp_D1007                                         |
| I, 5                | 5'-ATCTGGCACCAAATATGAGTCG-3'<br>5'-AATCTCGATTTTCAAGGAGTGG-3'   | CE1-247                                           |
| I, 13               | 5'-TCCTGGATAATCCCCAAAAA-3'                                     | snp_F58D5                                         |

|        |                                                                    |             |
|--------|--------------------------------------------------------------------|-------------|
|        | 5'-CCCTGCCATTGATCTTGTTT-3'                                         |             |
| I, 14  | 5'-TTGAAATCCCCTTTAAAATCCC-3'<br>5'-ACACTGGGTACCTGACTCATGC-3'       | uCE1-1361   |
| I, 26  | 5'-ATTATTAACGGCCACGGTGA-3'<br>5'-CCCACACACTCTCACCTTCA-3'           | snp_Y105E8B |
| V, -17 | 5'-TTTCGGAAAATTGCGACTGT-3'<br>5'-CGCGTTTTGGAGAATTGTTT-3'           | pkP5076     |
| V, -5  | 5'-GAGATTCTAGAGAAATGGACACCC-3'<br>5'-AAAAATCGACTACACCACTTTTAGC-3'  | snp_Y61A9L  |
| V, 1   | 5'-AGAAATGATCCGATGAAAAAGC-3'<br>5'-CCGATAGTGTTTCATAGCATCCC-3'      | pkP5097     |
| V, 6   | 5'-CAAATTAATATTTTCTCAAAGTTTCGG-3'<br>5'-ACATAAGCGCCATAACAAGTCG-3'  | R10D12      |
| V, 18  | 5'-GAAATTCAAATTTTTGAGAAACCC-3'<br>5'-TTCAGACCATTTTTAGAATATTCAGG-3' | snp_Y17D7B  |

## Uncropped blots from Figure 2

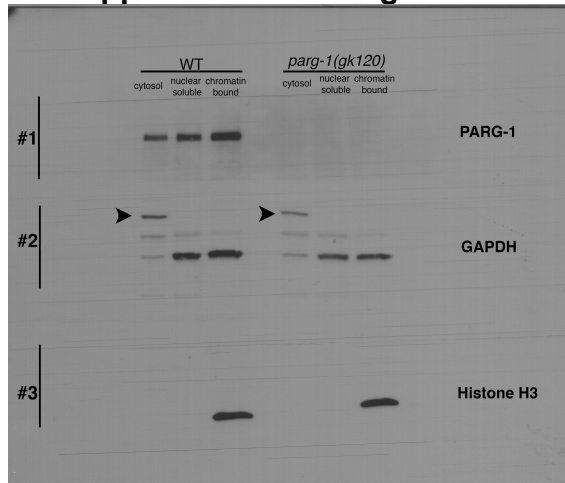

Fig. 2a

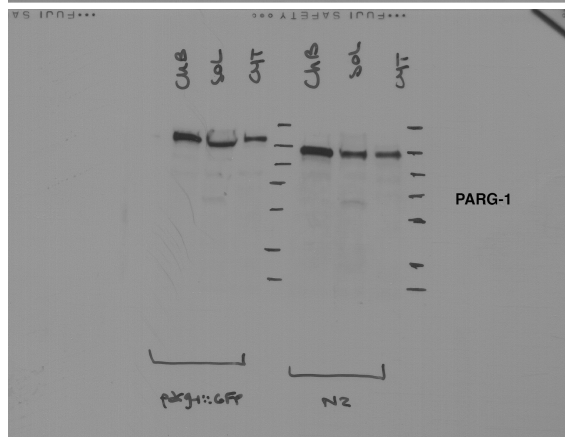

Fig. 2b

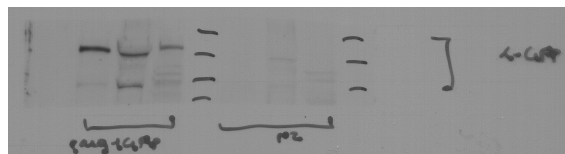

Fig. 2b

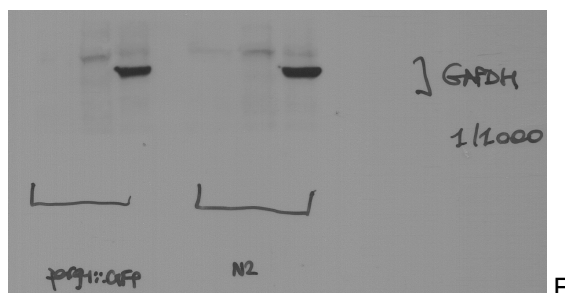

Fig. 2b

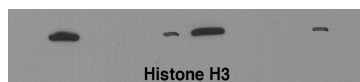

Fig. 2b
